# Supplementary material for: Constructing a Smart-Assistant for Improving the Outpatient Service Quality in Real-time: a Prospective Single-center Cohort Study
Source: Research Square preprint supplement (doi:10.21203/rs.3.rs-7066667/v1), 2025-07-29
Supplement: Supplementary file 1 [file cfd041b00d38a6f0e876c2df.docx]

**Supplements**

1. **Data sharing statement**
2. **Audio to text transcription**
3. **Quality improvement function**
4. **Data sharing statement**

**Data sharing statement**

Individual deidentifed participant data that underline the results reported in this article will be shared after article publication. To gain access, data requesters could contact the corresponding author.

1. **Audio-to-Text Transcription**

**Automatic Speech Recognition (ASR) models**

Whisper1, a typical sequence-to-sequence (Seq2Seq) model for the task of automatic speech recognition, achieves human level performance in ASR with 680k hours of weakly supervised data. It is built on the transformer architecture, stacking encoder blocks and decoder blocks with the attention mechanism propagating information between both, thus encoding the raw audio signal into a series of high-dimensional feature vectors, and then decoding the corresponding text sequence.

FunASR’s flagship model, Paraformer, is a non-autoregressive end-to-end speech recognition model that has been trained on a manually annotated Mandarin speech recognition dataset that contains 60,000 hours of speech2. Moreover, ASR, timestamp prediction, voice activity detection (VAD), punctuation prediction, speaker diarization and other functional modules based on multi-task learning provide a solid foundation for building high-precision long audio speech recognition services. After loading the audio file using FunASR, the VAD module detects the audible portion of the audio. And then the ASR model transcribes the audible segments of the audio to text and combines it with a punctuation prediction model to generate text with punctuation marks.

**Entity Correction Approach with corpora**

To address the problem of inaccurate recognition of medical terminology in doctor-patient conversations and the time-consuming and costly nature of traditional training methods that utilize large amounts of audio/text data for domain adaptation, we adopt an entity correction approach that incorporates a corpus.

During transcription, the above two models allow for the introduction of domain-specific corpora (e.g., medical terminology). By loading a pre-defined dictionary of hot words (including the terms and their corresponding pinyin), the models can prioritize the identification and correction of these hot words during transcription to enhance the accuracy of recognition. A method based on the longest common subsequence (LCS) of their pinyin is used in the hot word replacement process to select the entities from the corpus3, thus ensuring that words with similar pronunciations are correctly replaced.

**Speaker Diarization**

The Pyannote model and the CAM++ model4,5, respectively integrated in whisper and FunASR, are used to perform speaker diarization to answer the question "who speake when?" in conversations and generate annotations containing the speaker identifiers and timestamps. Finally, cluster to group speech segments by speaker identity, thus combining the speech of the same speaker in consecutive time segments into complete sentences.

**Evaluation**

For the transcription performance of the above two models, semantic textual similarity (STS) and character error rate (CER) are used as evaluation criteria. STS is used to evaluate the semantic consistency of the transcribed text with the reference text6, while CER measures the character-level error rate during the transcription process.

(https://huggingface.co/sentence-transformers/all-MiniLM-L6-v2; https://github.com/jitsi/jiwer)

1. **Quality improvement function**

**Quality control points recognition**

**Fine-tuning with LoRA (Low-Rank Adaptation)**

While pre-trained large language models exhibit remarkable performance across various general tasks, their performance in specific fields and tasks, such as healthcare, is not satisfactory. By fine-tuning, we can optimize and improve the performance and adaptability of pre-trained large models to meet our personalized needs.

We fine-tune the base large models leveraging LoRA, a parameter-efficient fine-tuning technique centered on implicitly applying low-rank transformations to the weight matrices of large models.

As a quick summary, let W represent the weight matrix within a given neural network layer, and ΔW denotes the weight update to W after full fine-tuning. We can then decompose the weight update matrix ΔW into two smaller matrices: ΔW = WA*WB, where WA is an A×r matrix and WB is an r×B matrix. Here, we maintain the original weights W unchanged and solely train the new matrices WA and WB. This approach of training a low-rank factorization approximation of ΔW effectively achieves performance parity with other PEFT methods, all without incurring additional inference costs.

The version number of GPT used in this study is GPT-4o. The vsersion number of DeepSeek used in this study is DeepSeek-R1-Distill-Qwen-14B.

**Reference**

1. Radford A, Kim JW, Xu T, Brockman G, McLeavey C, Sutskever IJae-p. Robust Speech Recognition via Large-Scale Weak Supervision. (<https://ui.adsabs.harvard.edu/abs/2022arXiv221204356R>).

2. Gao Z, Li Z, Wang J, et al. FunASR: A Fundamental End-to-End Speech Recognition Toolkit. (<https://ui.adsabs.harvard.edu/abs/2023arXiv230511013G>).

3. Zhang M, Qiao X, Zhao Y, et al. Knowledge Prompt for Whisper: An ASR Entity Correction Approach with Knowledge Base. 2023:2975-2979.

4. Plaquet A, Bredin HJae-p. Powerset multi-class cross entropy loss for neural speaker diarization. (<https://ui.adsabs.harvard.edu/abs/2023arXiv231013025P>).

5. Wang H, Zheng S, Chen Y, Cheng L, Chen QJae-p. CAM++: A Fast and Efficient Network for Speaker Verification Using Context-Aware Masking. (<https://ui.adsabs.harvard.edu/abs/2023arXiv230300332W>).

6. He H, Choi JDJae-p. The Stem Cell Hypothesis: Dilemma behind Multi-Task Learning with Transformer Encoders. (<https://ui.adsabs.harvard.edu/abs/2021arXiv210906939H>).

**Table S1. Inconsistency distribution.**

| Model | ACC in quality-control (95%CI), % | Inconsistence Type | | | | ACC in Preliminary Diagnosis (95%CI), % | Inconsistence Type | | |
| --- | --- | --- | --- | --- | --- | --- | --- | --- | --- |
| total | omission | error | extra | total | related | irrelevant |
| HuatuoGPT-II | 58.23 (55.32-61.08) | 469.92 | 132.75 | 190.67 | 146.50 | 43.20 (34.85-51.96) | 71 | 25 | 46 |
| Llama-3 | 68.74 (65.98-71.39) | 351.58 | 93.67 | 121.92 | 136.00 | 45.60 (37.13-54.33) | 68 | 43 | 25 |
| ChatGLM3 | 60.31 (57.42-63.13) | 446.50 | 83.58 | 186.83 | 176.08 | 62.40 (53.66-70.40) | 47 | 20 | 27 |
| ChatGPT-4 | 71.61 (68.92-74.18)### | 319.33 | 109.83 | 47.50 | 162.00 | 47.20 (38.66-55.90)### | 66 | 42 | 24 |
| HuatuoGPT-II-FT | 91.53 (89.76-93.02)*** | 95.33 | 62.08 | 10.00 | 23.25 | 78.40 (70.40-84.71)*** | 27 | 11 | 16 |
| Llama-3-FT | 90.11 (88.23-91.72)*** | 111.25 | 52.92 | 19.50 | 38.83 | 75.20 (66.95-81.94)*** | 31 | 14 | 17 |
| ChatGLM3-FT | 88.75 (86.77-90.47)*** | 126.58 | 78.33 | 17.00 | 31.25 | 72.00 (63.56-79.12)* | 35 | 12 | 23 |
| EHR-ANGEL in  Prospective cohort | 94.40 (92.84-95.63) | 43.33 | 32.25 | 3.00 | 8.08 | 50.00 (37.92-62.08) | 31 | 17 | 14 |

*Compared with large language models before fine-tuning.

#Compared with HuatuoGPT-II-FT.

*/#Significant at 5% level. **/##Significant at 1% level. ***/###Significant at 0.1% level

**Table S2. Reference Table for Quality Control Key Points**

| Quality Control Key Points for Abdominal pain | |
| --- | --- |
| Symptom | Abdominal pain |
| Characteristics | Acute, Chronic, Migratory, Dull pain, Ache, Colicky, Sharp, Stabbing pain, Spasmodic, Crushing, Pricking, Radiating, Referred pain, Burning pain, Drilling-like pain |
| Predisposing conditions | After eating greasy food, Before defecation, After drinking |
| Influencing factors | Postprandial, Postural change, After defecation, Hunger |
| Onset characteristics | Sudden onset, Constant, Frequently recurring, Intermittent, Persistent, Nocturnal |
| Location | Upper abdomen, Lower abdomen, Left upper quadrant, Right upper quadrant, Left lower quadrant, Right lower quadrant, Whole abdomen, Periumbilical, Epigastrium, Hypogastrium, Subcostal |
| Duration | 4 hours, 3 days, 1 week |
| Accompanied symptoms | Fever, Chills, Jaundice, Shock, Anemia, Nausea, Vomiting, Acid reflux, Diarrhea, Hematuria |
| Disease progression | Aggravated, Recurrent |

**Table S3. Baseline characteristics**

|  | | | |
| --- | --- | --- | --- |
|  | Original  test set | Prospective  cohort |  |
| Characteristics | (n=125) | (n=62) | *P* value |
| Age, mean (SD) | 53.8 (15.6) | 44.6 (16.9) | 0.14 |
| Female, n (%) | 59 (47.2%) | 34 (54.8%) | 0.33 |
| Preliminary diagnosis |  |  | <0.001 |
| Gastroesophageal reflux disease | 0 | 4 |  |
| Gastritis | 0 | 11 |  |
| Acute gastritis | 3 | 6 |  |
| Chronic gastritis | 0 | 10 |  |
| Bile reflux gastritis | 0 | 1 |  |
| Peptic ulcer | 0 | 3 |  |
| Helicobacter py*lori* infection | 0 | 1 |  |
| Pyloric obstruction | 1 | 0 |  |
| Functional dyspepsia | 0 | 2 |  |
| Bowel obstruction | 15 | 0 |  |
| Enterospasm | 1 | 6 |  |
| Irritable bowel syndrome | 3 | 8 |  |
| Intestinal dysbacteriosis | 0 | 1 |  |
| Cholelithiasis | 2 | 0 |  |
| Choledocholithiasis | 15 | 0 |  |
| Cholecystolithiasis | 10 | 0 |  |
| Choledocholithiasis with acute cholecystitis | 1 | 0 |  |
| Cholecystolithiasis with acute cholecystitis | 11 | 0 |  |
| Choledocholithiasis with cholangitis | 2 | 0 |  |
| Acute pyogenic cholangitis | 1 | 0 |  |
| Chronic cholecystitis | 0 | 1 |  |
| Acute cholecystitis | 2 | 0 |  |
| Hepatic insufficiency | 1 | 0 |  |
| Hepatic cyst | 1 | 0 |  |
| Chronic hepatitis | 1 | 0 |  |
| Obstructive jaundice | 2 | 0 |  |
| Acute pancreatitis | 22 | 0 |  |
| Pancreatic caudal space-occupying lesions | 1 | 0 |  |
| Chronic appendicitis | 6 | 0 |  |
| Acute appendicitis | 18 | 0 |  |
| Periappendiceal abscess | 1 | 0 |  |
| Mesenteric panniculitis | 0 | 1 |  |
| Abdominal wall contusion | 0 | 1 |  |
| Urolithiasis | 2 | 0 |  |
| Dilated left ureter | 1 | 0 |  |
| Torsionofthepedicleofovariancyst | 1 | 0 |  |
| Pelvic mass | 1 | 0 |  |
| Spinal cord compression | 0 | 4 |  |
| Lumbar disc herniation | 0 | 1 |  |
| Old pulmonary lesions | 0 | 1 |  |

**Table S4. Example of** **Free Text to Structured Medical Record**

|  | |
| --- | --- |
| Doctor-patient Dialogue | Doctor: Hello, what can I do for you today?  Patient: I've been having stomach pain.  Doctor: Where exactly does it hurt?  Patient: Just here, above my stomach.  Doctor: How long have you been experiencing this pain?  Patient: I have had it on and off for a week now.  Doctor: Did it come on suddenly or more gradually?  Patient: Very suddenly  Doctor: Does it always there, or does it come and go?  Patient: Always there.  Doctor: Is it staying the same or getting better or worse, since it started?  Patient: It gets worse after meals.  Doctor: Have you ever had hiccups or acid reflux?  Patient: No, I just feel uncomfortable.  Doctor: Have you been nauseous?  Patient: Yes. A little.  Doctor: Did you vomit?  Patient: No.  Doctor: How about fever? Have you had a fever?  Patient: No. I don't think so.  Doctor: Did you take any medicine to treat your symptoms?  Patient: No, but I did have some tests done.  Doctor: Do you have the results with you? Let me take a look.  Patient: Yes, here are my test results. I had an endoscopy at the local hospital, which showed erosive gastritis. A CT scan revealed intrahepatic bile duct stones, thickening of the gallbladder wall, and some intestinal gas. The pain was severe today, so I came to your hospital for blood tests. The results showed pancreatic enzymes at 1877 U/L and elevated lipase levels.  Doctor: How have your appetite and sleep patterns been recently?  Patient: Sleeping is okay, but I have no appetite.  Doctor: Are you having your bowels open regularly?Did you have any diarrhea or constipation?  Patient: I have a bowel movement once a day.  Doctor: Any burning when you urinate?  Patient: No.  Doctor: Have you noticed any other symptoms or uncomfortable since the pain started?  Patient: No.  Doctor: Now I am going to ask you some questions about your past health.  Patient: Okay.  Doctor: Have you ever had pain like this before?  Patient: Never.  Doctor: Do you have any previous medical conditions?Are you taking any medications currently?  Patient: I have hypertension and take Nifedipine daily.  Doctor: Do you have a history of infectious diseases like hepatitis or tuberculosis?  Patient: No.  Doctor: Have you ever been hospitalized or operated on for anything?  Patient: No.  Doctor: Do you have any hereditary diseases in your family?  Patient: No.  Doctor: Are you allergic to or have had a strange reaction to any medication?  Patient: No. |
| Chief Complaint | Upper abdominal pain for one week |
| History of Present Illness | One week ago, the patient developed unexplained sudden and persistent upper abdominal distension and pain, which worsened after eating, accompanied by nausea, without vomiting or fever. The patient had normal sleep, poor appetite and regular bowel movements since the onset of the disease. |
| Past History and Other History | History of hypertension, Nifedipine is taken orally daily. |
| Allergy History | No drug or food allergies. |
| Auxiliary Examination | Local hospital endoscopy: erosive gastritis, upper abdominal CT: intrahepatic bile duct stones, gallbladder wall thickening, partial bowel distention. Pancreatic biochemistry in our hospital: Amy 1877 U/L, elevated lipase. |

|  | |
| --- | --- |
| Doctor-patient Dialogue | Doctor: Hello, what seems to be the trouble?  Patient: I am having stomach pain.  Doctor: Where is it, can you show me?  Patient: It's just here, below my navel, for one day.  Doctor: Can you describe the pain to me?  Patient: It just feels like a tight, really severe pain.  Doctor: Is it intermittent pain?  Patient: No, it’s constant.  Doctor: Has the pain always been in the lower abdomen? Does it move anywhere?  Patient: No, it hasn’t changed.  Doctor: Does it hurt more after certain exercises or actions?Is the stomach pain related to your body position or eating?  Patient: It doesn’t seem to be.  Doctor: Have you had a fever?  Patient: No.  Doctor: Nausea or vomiting?  Patient: No.  Doctor: Have you tried anything to make it better? Have you taken any medication or had any tests done at another hospital?  Patient: I had an X-ray in your emergency department. Here’s the report: the abdominal standing X-ray indicates intestinal obstruction.  Doctor: Have you had a bowel movement?  Patient: No, I haven’t.  Doctor: Have you passed gas?  Patient: No.  Doctor: Are you passing urine OK?  Patient: I feel the same as usual.  Doctor: Have you noticed any changes in your appetite, energy levels, or sleep patterns?  Patient: My appetite has decreased, I’ve been feeling more fatigued than usual, and my sleep has been a bit disturbed.  Doctor: Have you lost weight?  Patient: I don’t know.  Doctor: Do you have any previous medical conditions? Like a history of hypertension, coronary heart disease, or diabetes?  Patient: No.  Doctor: Are you taking any medications currently?  Patient: No.  Doctor: Do you have a history of hepatitis or tuberculosis?  Patient: No.  Doctor: Are you allergic to anything?  Patient: No. |
| Chief Complaint | Lower abdominal pain for one day. |
| History of Present Illness | The patient was found by family members to have severe lower abdominal pain one day ago. The pain persisted for several hours without shifting, and was not relieved by any specific position. After the onset of pain, there was cessation of gas and bowel movements, without nausea, vomiting, fever, or radiating pain. There were no other significant discomforts. No special treatment was undertaken before coming to our emergency department. The patient was admitted to our department with a diagnosis of "intestinal obstruction." Since the onset of the disease, the patient had poor appetite and sleep, normal urination, decreased physical strength, and no significant change in weight. |
| Past History and Other History | The patient denies any history of coronary heart disease, hypertension, diabetes, hepatitis, or tuberculosis. |
| Allergy History | No history of allergies to specific foods or medications. |
| Auxiliary Examination | The emergency department abdominal standing X-ray indicates intestinal obstruction. |
